# Supplementary material for: From feather to fur: gull and mink H5N1 clade 2.3.4.4b HPAIV in their original hosts and their spillover and spillback potential
Source: Research Square preprint supplement (doi:10.21203/rs.3.rs-7357485/v1), 2025-08-14
Supplement: Supplementary file 1 [file 4d934bdfab2de35d489693fb.pdf]

## **Additional information**

**Supplementary Table 1.** Total reads, mean coverage, and name of fastq file stored in ENA repository (check data availability section) of all the samples sequenced.

| <b>Sample</b>      | <b>Total reads</b> | <b>Mean coverage</b> | <b>Fastq file (ENA)</b>   |
|--------------------|--------------------|----------------------|---------------------------|
| inoculum H5N1/mink | 1109994            | 17073                | H5N1_mink_inoc.fastq      |
| inoculum H5N1/gull | 2293245            | 56777                | H5N1_gull_inoc.fastq      |
| mink #2 brain      | 1339928            | 945                  | mink2_brain.fastq         |
| mink #4 brain      | 1460345            | 16864                | mink4_brain.fastq         |
| mink #2 OP         | 228346             | 1362                 | mink2_OPswab_7dpi.fastq   |
| mink #4 OP         | 310817             | 3842                 | mink4_OPswab_7dpi.fastq   |
| mink #19 OP        | 153002             | 2694                 | mink19_OPswab_4dpi.fastq  |
| mink #20 OP        | 302248             | 4280                 | mink20_OPswab_4dpi.fastq  |
| mink #23 OP        | 345232             | 984                  | mink23_OPswab_4dpi.fastq  |
| gull #2B OP        | 115725             | 2644                 | gull2B_OPswab_10dpi.fastq |
| gull #3B OP        | 81852              | 1901                 | gull3B_OPswab_10dpi.fastq |
| gull #4B OP        | 203591             | 4989                 | gull4B_OPswab_10dpi.fastq |
| gull #1Y OP        | 245257             | 5622                 | gull1Y_OPswab_10dpi.fastq |
| gull #3Y OP        | 120946             | 2838                 | gull3Y_OPswab_10dpi.fastq |
| gull #4Y OP        | 102297             | 2255                 | gull4Y_OPswab_10dpi.fastq |

**Supplementary Table 2.** Viral antigenic distribution in tissues of minks experimentally infected with H5N1/gull or H5N1/mink H5N1 HPAIVs. Results are expressed as the number of positive minks per total number of minks, and the average detection score in brackets including + (focal/oligofocal), ++ (multifocal), +++ (coalescing to diffuse) For each tissue and group, absence of brackets indicates absence of immunodetection (-). Neg (negative controls); Inoc3 = inoculated euthanised at 3 dpi; Inoc16 = inoculated euthanised at 16 dpi; InocCl = Inoculated and clinically affected minks euthanised at 5 dpi (n=2), 6 dpi (n=1), 7 dpi (n=1); DC: direct contacts; AC= aerosol contacts.

|              | H5N1/gull |         |         |      |      | H5N1/mink |         |          |     |     |
|--------------|-----------|---------|---------|------|------|-----------|---------|----------|-----|-----|
| Tissue       | Neg       | Inoc3   | Inoc16  | DC16 | AC16 | Neg       | Inoc3   | InocC1   | DC  | AC  |
| Nasal Cavity | 0/3       | 2/3 (+) | 0/4     | 0/2  | 0/6  | 0/2       | 1/3 (+) | 4/4 (++) | 0/2 | 0/6 |
| Lung         | 0/3       | 0/3     | 0/4     | 0/2  | 0/6  | 0/2       | 1/3 (+) | 4/4 (++) | 0/2 | 0/6 |
| Brain        | 0/3       | 0/3     | 1/4 (+) | 0/2  | 0/6  | 0/2       | 0/3     | 4/4 (++) | 0/2 | 0/6 |

15

16

17

18

19 **Supplementary Table 3.** Variants detected in the brain of mink #4 inoculated with the  
20 H5N1/gull virus. The table includes the viral genome segment, position (POS), reference  
21 (REF) and alternate (ALT) nucleotides, the variant frequency in mink brain  
22 (FREQ\_mink), total sequencing depth (DEPTH\_mink), number of reads supporting the  
23 variant (VARIANT\_DEPTH\_mink), and the corresponding amino acid substitution  
24 (PROTEIN\_CHANGE\_mink).

| Segment | POS | REF | ALT | FREQ_mink | DEPTH_mink | VARIANT_DEPTH_mink | PROTEIN_CHANGE_mink |
|---------|-----|-----|-----|-----------|------------|--------------------|---------------------|
| M       | 610 | G   | A   | 0.9754    | 17208      | 16785              | E204K               |
| PB2     | 811 | A   | G   | 0.9637    | 634        | 611                | T271A               |
| HA      | 878 | A   | G   | 0.957     | 6442       | 6165               | K293R               |

25

26

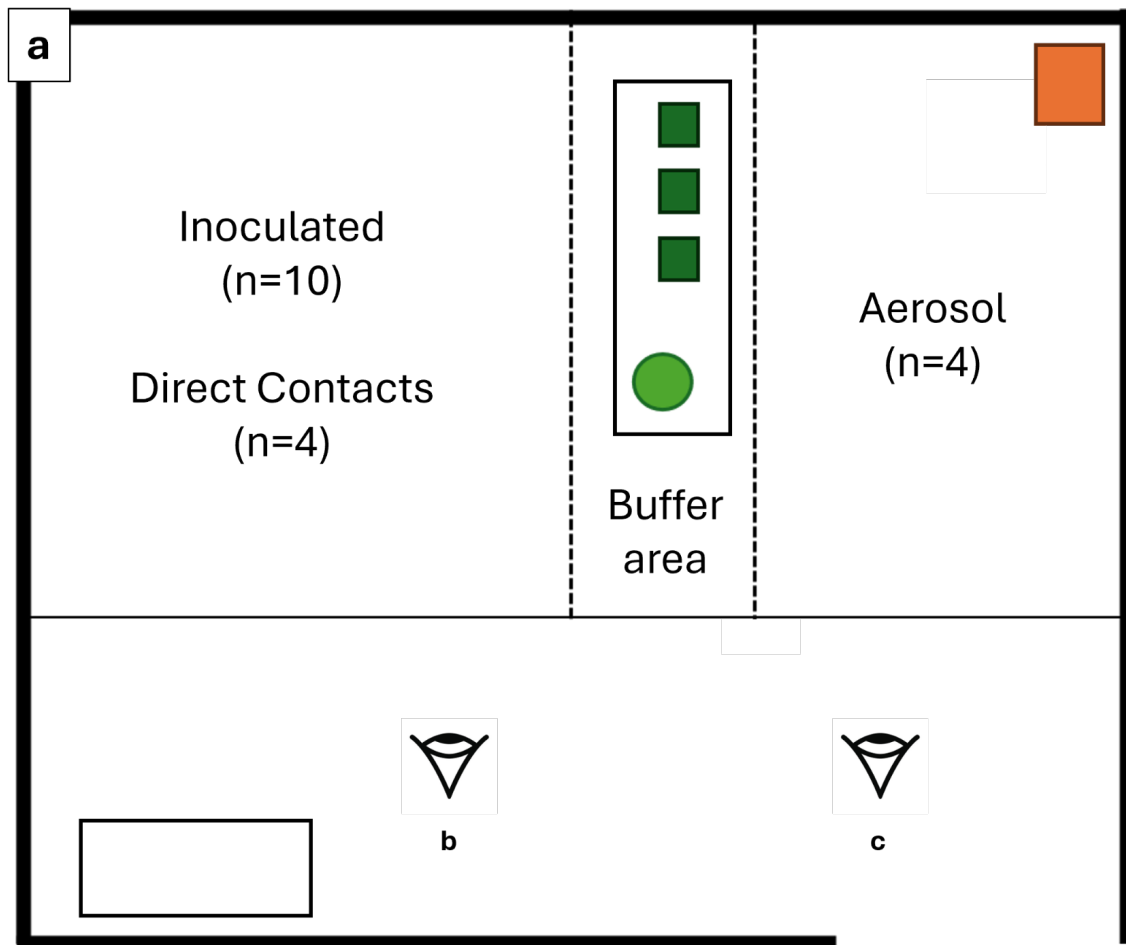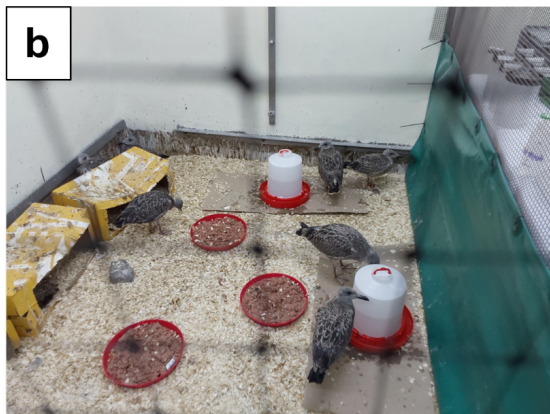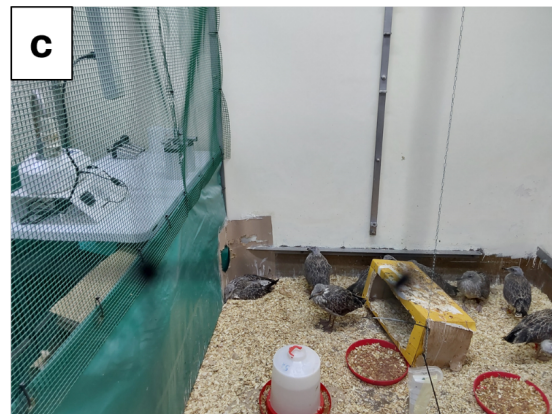

27

28 **Supplementary Figure 1.** Gull housing and distribution of the experimental room. **a**, Top view schematics.  
 29 Each of the two experimental rooms (one per virus) had three areas: i) Inoculated and direct contacts (left),  
 30 which housed 10 inoculated birds and 4 direct contacts; ii) Buffer area (middle), 1-m-wide, where  
 31 environmental samplers were located (green); and iii) Aerosol contacts (right), which housed 4 birds. Areas  
 32 were set favouring aerosol transmission, with aerosol contacts being closer to the exhaust (orange). **b**,  
 33 Inoculated and direct contact area. **c**, Buffer area with the Coriolis  $\mu$  active air sampler and the Modified  
 34 Wilson and Cooke passive air samplers (left) and aerosol contacts below the exhaust (right).

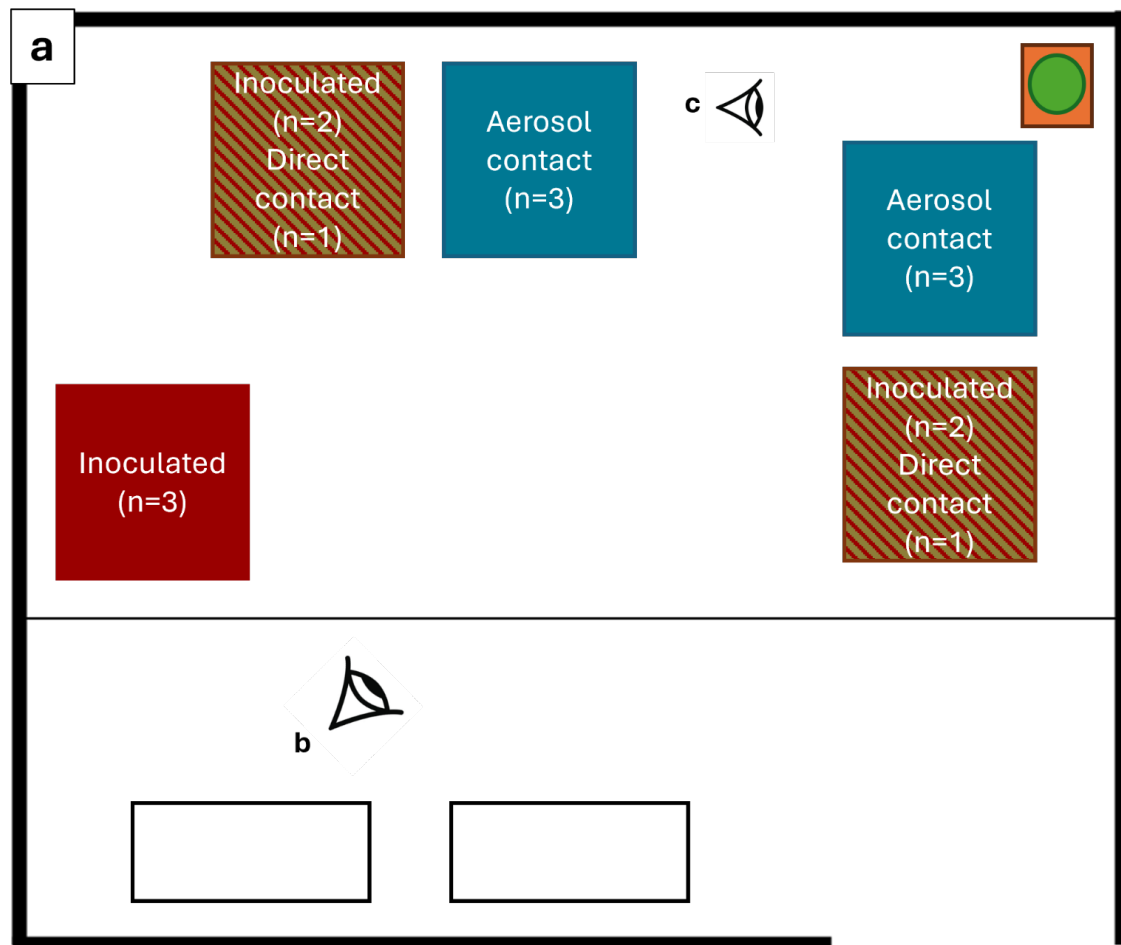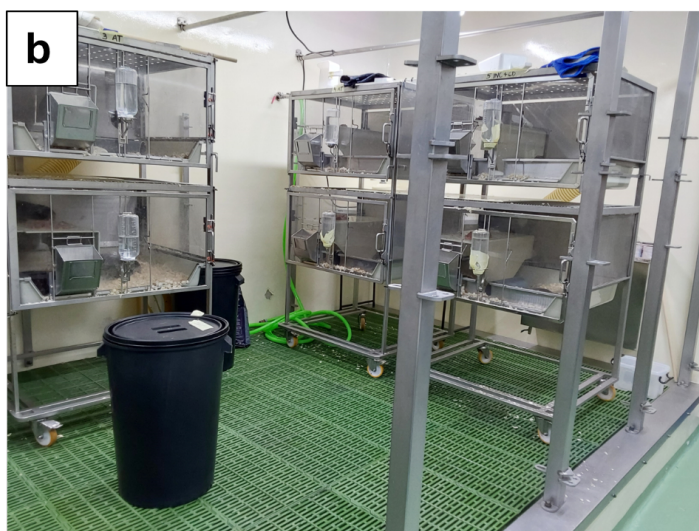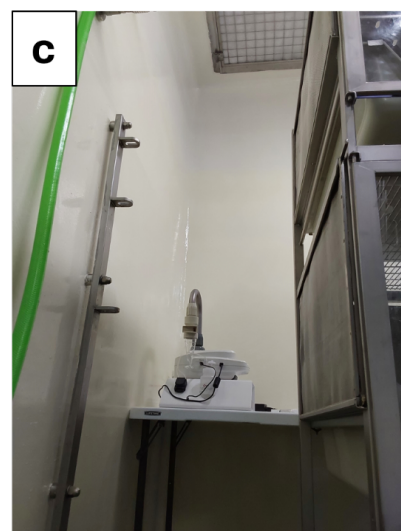

**Supplementary Figure 2.** Mink housing and distribution in the experimental room. **a**, Top view schematics. Each of the two experimental rooms (one per virus) had two transmission settings. Each transmission setting consisted of two cages: i) Inoculated (n=2) and direct contacts (n=1) (red and gold stripes); ii) Aerosol contacts (n=3) (blue). Cages were set favouring aerosol transmission, with aerosol

contacts and the Coriolis  $\mu$  active air sampler (green) being closer to the exhaust (orange). **b**, Transmission setting. **c**, Location of the Coriolis  $\mu$  active air sampler below the exhaust.

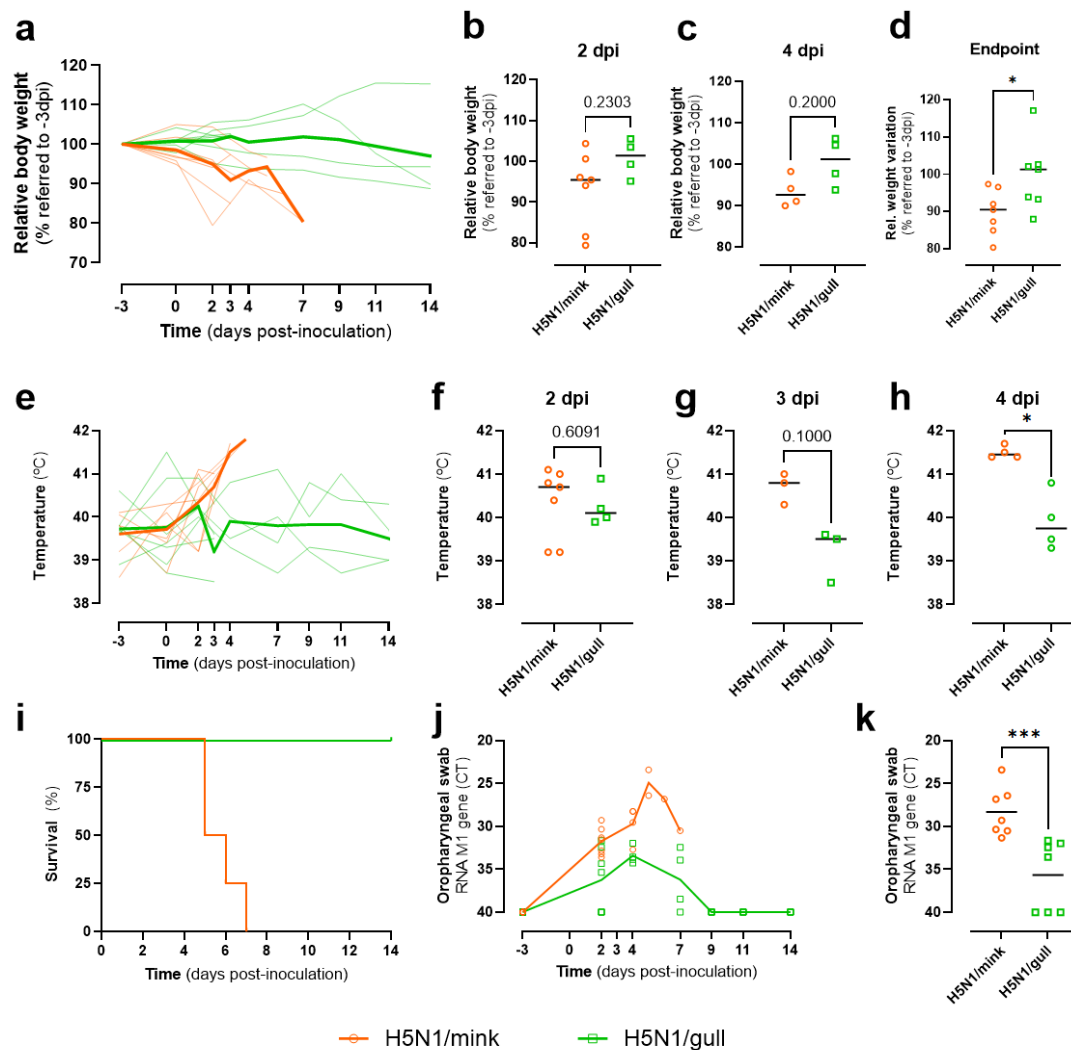

**Supplementary Figure 3.** Comparison of mink experimentally inoculated with A/Larso ridibundus/Spain/CR4063/2023 (H5N1/gull, green) and A/Mink/Spain/3691-8\_22VIR10586-10/2022 (H5N1/mink, orange). **a**, Follow-up of the body weight variation relative to -3 dpi. **b**, Relative body weight at 2 dpi. **c**, Relative body weight at 4 dpi. **d**, Relative body weight variation at endpoint (humane or experimental: 3-6 dpi for H5N1/mink and 3 or 16 dpi for H5N1/gull). Statistically significant differences were found between groups using a Mann-Whitney unpaired t test (\* $p < 0.05$ ). **e**, Follow-up of rectal temperature. **f**, Rectal temperature at 2 dpi. **g**, Rectal temperature at 3 dpi. **h**, Rectal temperature at 4 dpi.



Statistically significant differences were found between groups using a Mann-Whitney unpaired t test ( $p < 0.05$ ). **i**, Kaplan-Meier survival curve with significant differences found between H5N1/mink and H5N1-gull inoculated animals using a log-rank Mantel-Cox test ( $p < 0.05$ ). **j**, Follow-up of viral RNA load expressed as CT values of M1 gene. **k**, Lowest CT value achieved per animal (2-7 dpi). Statistically significant differences were found between groups using a Mann-Whitney unpaired t test ( $p < 0.005$ ).

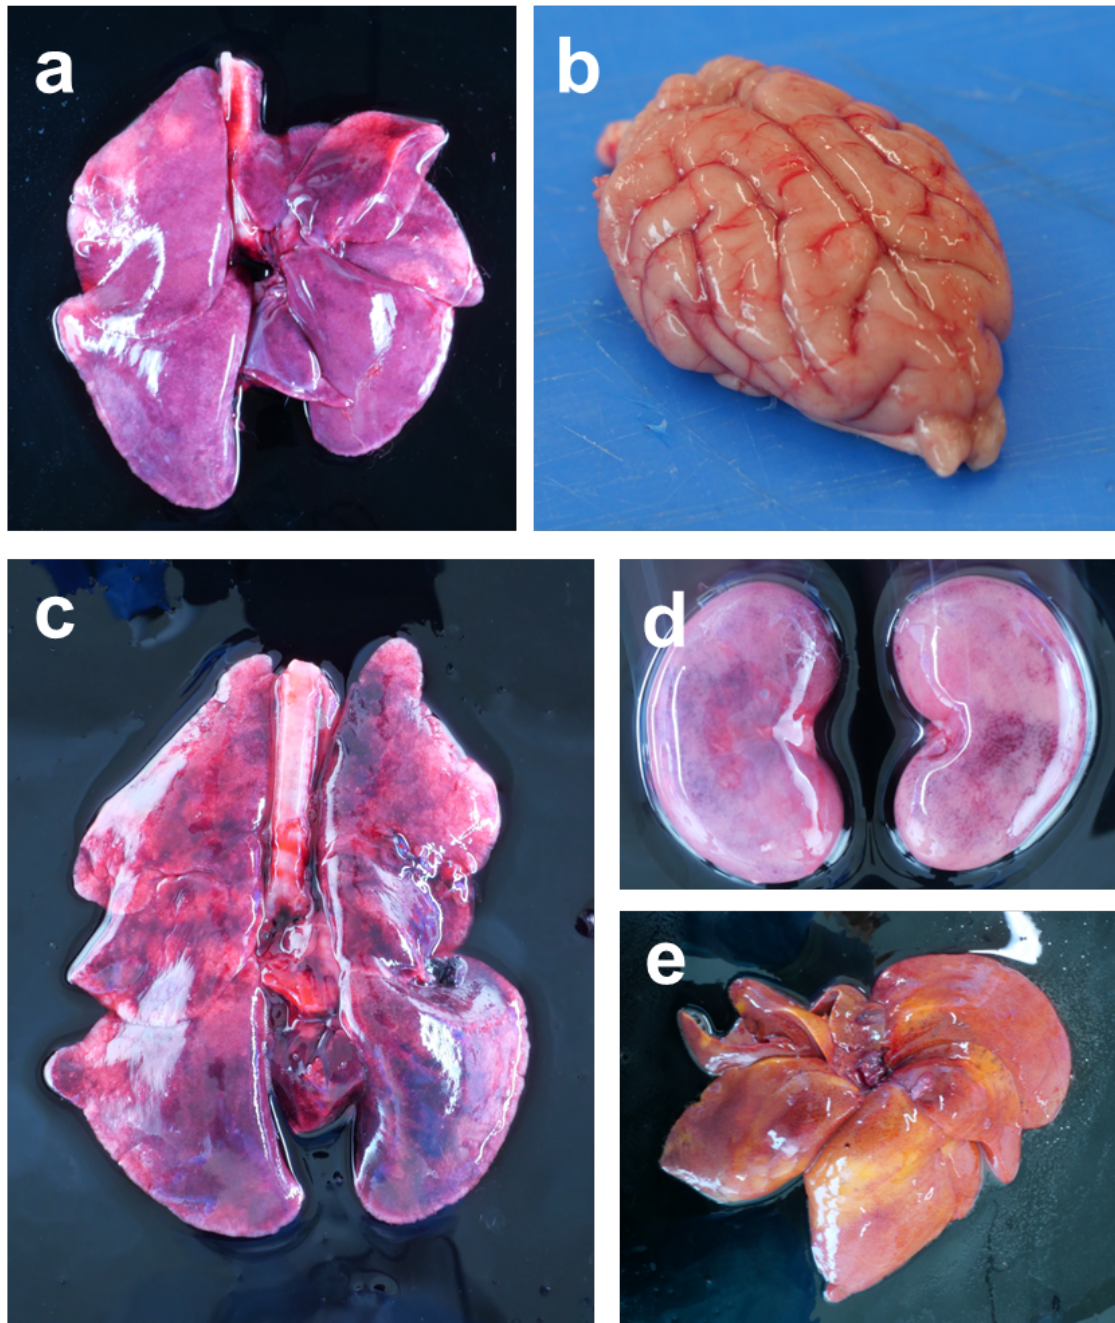

**Supplementary Figure 4.** Gross lesions observed in H5N1/mink-inoculated animals during necropsy. **a**, Lung, within normal limits (uninfected control). **b**, Brain, within normal limits (uninfected control). **c**,

Lung, red necrotic foci scattered in parenchyma. **d**, Kidney, red necrotic foci scattered in parenchyma. **e**,  
Liver, icteric and friable.

**Supplementary Data 1.** Pairwise nucleotide comparison of original H5N1/gull and  
H5N1/mink viruses used in experimental infections.  
Eight plain-text files (.txt), each corresponding to one genomic segment (HA, NA, PB2,  
PB1, PA, NP, M, NS). Each file includes alignment length, percentage nucleotide  
identity, and list of nucleotide differences between A/Larus  
ridibundus/Spain/CR4063/2023 (EPI\_ISL\_18983379) and A/Mink/Spain/3691-  
8\_22VIR10586-10/2022 (EPI\_ISL\_15878539). Data available at Zenodo repository  
[<https://zenodo.org/records/16813242>].
